# Supplementary material for: High throughput screening of semiconductors with low lattice thermal transport induced by long-range interactions
Source: Royal Society of Chemistry journal article supplement (doi:10.1039/d4mh00363b), 2024-01-01
Supplement: d4mh00363b1.pdf [file d4mh00363b1.pdf]

# High Throughput Screening of Semiconductors with Low Lattice Thermal Transport Induced by Long-Range Interactions (Supporting Information)

Yu Wu,<sup>\*,†</sup> Linxuan Ji,<sup>‡</sup> Yimin Ding,<sup>†</sup> and Liujiang Zhou<sup>\*,‡</sup>

<sup>†</sup>*Yangtze Delta Region Institute (Huzhou), University of Electronic Science and Technology  
of China, Huzhou 313001, China*

<sup>‡</sup>*School of Physics and State Key Laboratory of Electronic Thin Films and Integrated  
Devices, University of Electronic Science and Technology of China, Chengdu 610054, China*

E-mail: wuyu9573@qq.com; ljzhou@uestc.edu.cn

Table S1: The chemical formula, space group, supercell for AIMD calculation,  $\mathbf{q}$ -grid for  $\kappa_L$  calculation, formation energy (FE), average atomic mass and  $\kappa_L$  (300 K) of the screened 75 candidates. The chemical formula labeled with red color represents the material is unstable at 700 K.

| Chemical<br>Formula                | Space Group | Super Cell | $\mathbf{q}$ -grid | FE<br>(eV/atom) | Mass<br>(g/mol) | $\kappa_L$ (W/mK) | ref. |
|------------------------------------|-------------|------------|--------------------|-----------------|-----------------|-------------------|------|
| <b>Ag<sub>4</sub>O<sub>2</sub></b> | 224         | 3 × 3 × 3  | 11 × 11 × 11       | -0.82           | 77.25           | 2.14              |      |
| Ag <sub>4</sub> O <sub>4</sub>     | 14          | 2 × 4 × 2  | 9 × 14 × 9         | -1.01           | 61.93           | 3.90              |      |
| Ag <sub>4</sub> O <sub>6</sub>     | 43          | 3 × 2 × 3  | 14 × 14 × 14       | -1.01           | 52.75           | 8.77              |      |
| Al <sub>4</sub> Ru <sub>2</sub>    | 70          | 3 × 3 × 3  | 13 × 13 × 13       | -0.83           | 51.68           | 14.19             |      |

|                                  |     |           |              |       |        |       |                   |
|----------------------------------|-----|-----------|--------------|-------|--------|-------|-------------------|
| As <sub>2</sub> Mg <sub>3</sub>  | 164 | 4 × 4 × 2 | 15 × 15 × 7  | -0.67 | 44.55  | 2.00  |                   |
| As <sub>4</sub> Cd <sub>2</sub>  | 98  | 4 × 4 × 2 | 13 × 13 × 13 | -0.17 | 87.42  | 2.53  |                   |
| As <sub>4</sub> Te <sub>6</sub>  | 12  | 3 × 3 × 2 | 13 × 13 × 11 | -0.16 | 106.53 | 1.03  |                   |
| As <sub>8</sub> Na <sub>8</sub>  | 19  | 2 × 2 × 2 | 12 × 12 × 9  | -0.99 | 48.96  | 0.55  |                   |
| As <sub>8</sub> Na <sub>8</sub>  | 14  | 3 × 2 × 2 | 12 × 11 × 8  | -0.99 | 48.96  | 0.84  |                   |
| As <sub>8</sub> Rb <sub>8</sub>  | 19  | 2 × 2 × 2 | 12 × 12 × 9  | -0.52 | 80.19  | 0.33  |                   |
| Ba <sub>2</sub> Se <sub>4</sub>  | 15  | 4 × 4 × 2 | 13 × 13 × 13 | -2.03 | 98.42  | 1.31  |                   |
| Bi <sub>1</sub> Li <sub>3</sub>  | 225 | 3 × 4 × 3 | 13 × 13 × 13 | -1.24 | 57.50  | 1.67  | 2.1 <sup>1</sup>  |
| Bi <sub>2</sub> Se <sub>3</sub>  | 166 | 3 × 3 × 3 | 14 × 14 × 14 | -1.16 | 130.97 | 2.32  | 1.33 <sup>2</sup> |
| Bi <sub>4</sub> I <sub>4</sub>   | 12  | 3 × 3 × 2 | 13 × 13 × 6  | -1.06 | 167.94 | 0.82  |                   |
| Bi <sub>4</sub> Se <sub>8</sub>  | 12  | 2 × 2 × 3 | 13 × 13 × 6  | -1.04 | 122.30 | 0.34  |                   |
| Br <sub>4</sub> Te <sub>2</sub>  | 136 | 3 × 2 × 5 | 9 × 9 × 16   | -0.68 | 95.80  | 1.25  |                   |
| C <sub>4</sub> Os <sub>4</sub>   | 198 | 3 × 3 × 2 | 11 × 11 × 11 | -0.73 | 101.11 | 22.16 |                   |
| Ca <sub>2</sub> Ge <sub>1</sub>  | 225 | 4 × 4 × 4 | 12 × 12 × 12 | -1.02 | 50.92  | 5.73  |                   |
| Ca <sub>2</sub> Si <sub>1</sub>  | 225 | 4 × 4 × 4 | 12 × 12 × 12 | -0.89 | 36.08  | 8.66  |                   |
| Cl <sub>2</sub> Cu <sub>1</sub>  | 12  | 5 × 5 × 2 | 17 × 17 × 8  | -1.15 | 44.82  | 6.21  |                   |
| Co <sub>6</sub> O <sub>8</sub>   | 227 | 2 × 2 × 3 | 11 × 11 × 11 | -2.64 | 34.40  | 1.32  |                   |
| Cr <sub>3</sub> Si <sub>6</sub>  | 180 | 3 × 3 × 2 | 15 × 15 × 8  | -1.44 | 36.06  | 20.51 |                   |
| Cr <sub>3</sub> Si <sub>6</sub>  | 181 | 3 × 3 × 2 | 15 × 15 × 8  | -1.44 | 36.06  | 21.22 |                   |
| Cs <sub>4</sub> Te <sub>16</sub> | 14  | 2 × 3 × 2 | 11 × 12 × 9  | -0.55 | 128.66 | 0.28  |                   |
| Cu <sub>4</sub> O <sub>2</sub>   | 224 | 3 × 3 × 3 | 12 × 12 × 12 | -2.25 | 47.70  | 4.43  |                   |
| F <sub>4</sub> Hg <sub>2</sub>   | 136 | 3 × 3 × 3 | 10 × 10 × 13 | -1.93 | 79.53  | 1.90  |                   |
| F <sub>6</sub> Mn <sub>2</sub>   | 55  | 2 × 3 × 3 | 9 × 9 × 13   | -3.92 | 27.98  | 7.64  |                   |
| Fe <sub>4</sub> Si <sub>4</sub>  | 198 | 2 × 3 × 3 | 11 × 11 × 11 | -1.11 | 41.97  | 22.62 |                   |
| Ga <sub>4</sub> Os <sub>2</sub>  | 70  | 3 × 3 × 3 | 14 × 14 × 14 | -0.38 | 109.88 | 8.40  |                   |
| Ge <sub>1</sub> Mg <sub>2</sub>  | 225 | 4 × 4 × 4 | 14 × 14 × 14 | -0.45 | 40.41  | 8.49  | 5.6 <sup>3</sup>  |
| Ge <sub>1</sub> Se <sub>1</sub>  | 160 | 5 × 5 × 5 | 16 × 16 × 16 | -0.51 | 75.79  | 6.30  | 4.53 <sup>4</sup> |

|                                 |     |           |              |       |        |        |                  |
|---------------------------------|-----|-----------|--------------|-------|--------|--------|------------------|
| Ge <sub>1</sub> Te <sub>1</sub> | 160 | 5 × 5 × 5 | 16 × 16 × 16 | -0.41 | 100.10 | 5.56   |                  |
| Ge <sub>4</sub> O <sub>8</sub>  | 205 | 2 × 2 × 3 | 11 × 11 × 11 | -2.78 | 34.87  | 14.35  |                  |
| Ge <sub>4</sub> Se <sub>4</sub> | 62  | 2 × 4 × 3 | 5 × 21 × 21  | -0.75 | 75.78  | 2.48   |                  |
| Hf <sub>1</sub> Se <sub>2</sub> | 164 | 5 × 5 × 2 | 27 × 27 × 7  | -1.80 | 112.14 | 5.63   |                  |
| Hf <sub>2</sub> Se <sub>6</sub> | 11  | 3 × 4 × 2 | 11 × 15 × 7  | -1.50 | 103.84 | 4.55   |                  |
| In <sub>4</sub> S <sub>4</sub>  | 64  | 3 × 3 × 2 | 13 × 13 × 6  | -1.15 | 73.44  | 1.99   |                  |
| I <sub>4</sub> Te <sub>2</sub>  | 136 | 2 × 3 × 5 | 9 × 9 × 15   | -0.40 | 127.14 | 2.57   |                  |
| Ir <sub>4</sub> N <sub>8</sub>  | 14  | 2 × 3 × 2 | 11 × 10 × 11 | -3.17 | 73.41  | 25.43  |                  |
| K <sub>4</sub> O <sub>2</sub>   | 141 | 3 × 3 × 3 | 10 × 10 × 14 | -1.84 | 31.40  | 2.19   |                  |
| K <sub>6</sub> Te <sub>6</sub>  | 189 | 2 × 2 × 3 | 11 × 11 × 10 | -1.11 | 83.35  | 0.38   |                  |
| K <sub>8</sub> Te <sub>12</sub> | 62  | 1 × 2 × 4 | 8 × 10 × 16  | -0.97 | 92.20  | 0.34   |                  |
| Li <sub>3</sub> Sb <sub>1</sub> | 225 | 4 × 3 × 3 | 15 × 15 × 15 | -1.36 | 35.70  | 2.04   | 2.2 <sup>1</sup> |
| Li <sub>8</sub> P <sub>8</sub>  | 14  | 2 × 2 × 2 | 12 × 12 × 8  | -2.58 | 18.99  | 2.02   |                  |
| Mg <sub>1</sub> Te <sub>1</sub> | 225 | 4 × 4 × 4 | 15 × 15 × 15 | -0.91 | 75.95  | 2.88   |                  |
| Mg <sub>2</sub> Si <sub>1</sub> | 225 | 4 × 4 × 4 | 14 × 14 × 14 | -0.36 | 25.56  | 11.31  |                  |
| Mg <sub>3</sub> Sb <sub>2</sub> | 164 | 4 × 4 × 2 | 16 × 16 × 15 | -0.84 | 63.28  | 1.93   |                  |
| Mo <sub>3</sub> Si <sub>6</sub> | 180 | 3 × 3 × 2 | 15 × 15 × 8  | -1.08 | 50.70  | 14.96  |                  |
| N <sub>4</sub> Pt <sub>2</sub>  | 58  | 3 × 2 × 4 | 13 × 10 × 16 | -3.06 | 74.36  | 142.29 |                  |
| N <sub>6</sub> W <sub>3</sub>   | 152 | 3 × 3 × 2 | 12 × 12 × 8  | -3.80 | 70.62  | 5.07   |                  |
| N <sub>8</sub> W <sub>4</sub>   | 33  | 2 × 3 × 2 | 11 × 9 × 11  | -3.82 | 70.62  | 7.35   |                  |
| Na <sub>6</sub> S <sub>6</sub>  | 189 | 2 × 2 × 3 | 11 × 11 × 11 | -2.02 | 27.53  | 1.67   |                  |
| Na <sub>8</sub> P <sub>8</sub>  | 19  | 3 × 2 × 2 | 12 × 11 × 8  | -2.68 | 26.98  | 0.89   |                  |
| O <sub>11</sub> Zr <sub>6</sub> | 25  | 3 × 3 × 1 | 16 × 16 × 5  | -4.50 | 42.55  | 3.04   |                  |
| O <sub>2</sub> Pd <sub>2</sub>  | 131 | 5 × 5 × 2 | 16 × 16 × 9  | -1.56 | 61.21  | 84.21  |                  |
| O <sub>2</sub> Pt <sub>2</sub>  | 131 | 4 × 4 × 2 | 16 × 16 × 9  | -1.38 | 105.54 | 66.01  |                  |
| O <sub>6</sub> Pb <sub>4</sub>  | 31  | 5 × 2 × 2 | 15 × 8 × 10  | -2.06 | 92.48  | 0.89   |                  |
| O <sub>6</sub> Ti <sub>4</sub>  | 167 | 2 × 3 × 3 | 11 × 11 × 11 | -4.08 | 28.75  | 7.64   |                  |

|              |     |                       |                          |       |        |       |         |
|--------------|-----|-----------------------|--------------------------|-------|--------|-------|---------|
| $O_{12}Ti_8$ | 62  | $2 \times 2 \times 2$ | $8 \times 19 \times 8$   | -4.03 | 28.75  | 5.17  |         |
| $Os_2P_4$    | 58  | $2 \times 3 \times 5$ | $10 \times 8 \times 17$  | -2.98 | 84.05  | 30.53 |         |
| $Os_4Si_4$   | 198 | $3 \times 3 \times 2$ | $11 \times 11 \times 11$ | -0.80 | 109.14 | 16.76 |         |
| $Pb_1Se_1$   | 225 | $4 \times 4 \times 4$ | $14 \times 14 \times 14$ | -0.93 | 143.08 | 2.88  | $1.7^5$ |
| $Pb_1Te_1$   | 225 | $4 \times 4 \times 4$ | $13 \times 13 \times 13$ | -0.55 | 167.40 | 3.84  | $2.6^5$ |
| $Pb_2S_2$    | 186 | $5 \times 5 \times 2$ | $15 \times 15 \times 7$  | -1.20 | 119.63 | 1.76  |         |
| $Rb_2Te_5$   | 12  | $3 \times 2 \times 3$ | $10 \times 10 \times 13$ | -0.68 | 115.56 | 0.48  |         |
| $Rb_6Te_6$   | 189 | $2 \times 2 \times 3$ | $11 \times 11 \times 10$ | -0.96 | 106.53 | 0.39  |         |
| $Ru_4Si_4$   | 198 | $2 \times 3 \times 3$ | $11 \times 11 \times 11$ | -1.05 | 64.58  | 12.88 |         |
| $Sc_4Se_6$   | 15  | $3 \times 3 \times 2$ | $11 \times 11 \times 10$ | -2.14 | 65.36  | 1.76  |         |
| $Sc_4Te_6$   | 15  | $2 \times 3 \times 3$ | $11 \times 11 \times 10$ | -1.40 | 94.54  | 1.09  |         |
| $Se_2Sn_2$   | 63  | $4 \times 3 \times 3$ | $12 \times 12 \times 12$ | -0.77 | 98.83  | 1.27  | $0.9^6$ |
| $Se_2Sn_2$   | 129 | $5 \times 5 \times 2$ | $18 \times 18 \times 7$  | -0.73 | 98.83  | 2.98  |         |
| $Se_2Zr_1$   | 164 | $5 \times 5 \times 2$ | $18 \times 18 \times 7$  | -1.78 | 83.05  | 5.57  |         |
| $Se_4Sn_4$   | 62  | $2 \times 4 \times 3$ | $6 \times 14 \times 13$  | -0.78 | 98.83  | 2.42  | $1.3^6$ |
| $Se_6Zr_2$   | 11  | $3 \times 4 \times 2$ | $11 \times 15 \times 7$  | -1.53 | 82.03  | 4.48  |         |
| $Si_6W_3$    | 180 | $3 \times 3 \times 2$ | $15 \times 15 \times 8$  | -0.77 | 80.01  | 11.83 |         |

Table S2: The chemical formula, space group, supercell for AIMD calculation,  $\mathbf{q}$ -grid for  $\kappa_L$  calculation, formation energy (FE), average atomic mass and  $\kappa_L$  (300 K) of the screened 26 candidates without LRI.

| Chemical<br>Formula | Space Group | Super Cell            | $\mathbf{q}$ -grid       | FE<br>(eV/atom) | Mass<br>(g/mol) | $\kappa_L$ (W/mK) |
|---------------------|-------------|-----------------------|--------------------------|-----------------|-----------------|-------------------|
| $Al_2Os_1$          | 139         | $3 \times 3 \times 5$ | $14 \times 14 \times 19$ | -0.74           | 81.39           | 10.53             |
| $As_1Ga_1$          | 216         | $4 \times 4 \times 4$ | $15 \times 15 \times 15$ | -0.44           | 72.32           | 40.92             |
| $As_2K_6$           | 194         | $3 \times 3 \times 2$ | $14 \times 14 \times 7$  | -0.62           | 48.05           | 0.61              |
| $As_2Li_6$          | 194         | $3 \times 3 \times 2$ | $15 \times 15 \times 6$  | -1.18           | 23.99           | 3.92              |

|            |     |                       |                          |       |        |        |
|------------|-----|-----------------------|--------------------------|-------|--------|--------|
| $B_1Sb_1$  | 216 | $4 \times 4 \times 4$ | $15 \times 15 \times 15$ | -0.34 | 66.28  | 457.17 |
| $C_1Hf_1$  | 216 | $4 \times 4 \times 4$ | $15 \times 15 \times 15$ | -1.78 | 95.25  | 77.13  |
| $C_1Ru_1$  | 216 | $4 \times 4 \times 4$ | $15 \times 15 \times 15$ | -1.09 | 56.54  | 41.68  |
| $C_1Zr_1$  | 216 | $4 \times 4 \times 4$ | $15 \times 15 \times 15$ | -1.67 | 51.62  | 98.17  |
| $Fe_2Sb_4$ | 58  | $2 \times 2 \times 5$ | $10 \times 9 \times 17$  | -1.48 | 99.78  | 9.12   |
| $Fe_2Te_4$ | 58  | $3 \times 2 \times 4$ | $10 \times 9 \times 14$  | -0.65 | 103.68 | 11.51  |
| $Ga_1Sb_1$ | 216 | $4 \times 4 \times 4$ | $14 \times 14 \times 14$ | -0.74 | 95.74  | 49.19  |
| $Ga_4Se_4$ | 187 | $5 \times 5 \times 1$ | $19 \times 19 \times 4$  | -0.92 | 74.34  | 16.71  |
| $Ge_2Si_2$ | 186 | $5 \times 5 \times 2$ | $18 \times 18 \times 8$  | -0.46 | 50.35  | 106.45 |
| $In_1P_1$  | 216 | $4 \times 4 \times 4$ | $15 \times 15 \times 15$ | -2.00 | 72.90  | 90.86  |
| $In_2P_2$  | 186 | $5 \times 5 \times 2$ | $15 \times 15 \times 7$  | -1.99 | 72.90  | 80.78  |
| $In_4Se_4$ | 194 | $5 \times 5 \times 1$ | $17 \times 17 \times 5$  | -0.83 | 96.89  | 11.83  |
| $K_3Sb_1$  | 225 | $3 \times 3 \times 3$ | $11 \times 11 \times 11$ | -0.94 | 59.76  | 0.93   |
| $K_4Te_4$  | 194 | $3 \times 3 \times 2$ | $15 \times 15 \times 7$  | -1.10 | 83.35  | 0.48   |
| $K_6Sb_2$  | 194 | $3 \times 3 \times 2$ | $14 \times 14 \times 7$  | -0.96 | 59.76  | 0.51   |
| $Li_6P_2$  | 194 | $3 \times 3 \times 2$ | $15 \times 15 \times 7$  | -2.01 | 13.00  | 4.03   |
| $Mo_2Te_4$ | 194 | $5 \times 5 \times 1$ | $19 \times 19 \times 4$  | -0.64 | 117.05 | 15.72  |
| $Ni_2P_4$  | 15  | $2 \times 3 \times 3$ | $13 \times 13 \times 16$ | -2.82 | 40.21  | 26.32  |
| $P_4Pd_2$  | 15  | $3 \times 3 \times 2$ | $13 \times 13 \times 10$ | -2.81 | 56.12  | 23.22  |
| $Pt_2S_2$  | 131 | $5 \times 5 \times 2$ | $14 \times 14 \times 8$  | -1.18 | 113.57 | 58.20  |
| $Ru_2Te_4$ | 58  | $3 \times 2 \times 4$ | $11 \times 10 \times 14$ | -0.58 | 118.76 | 18.34  |
| $Si_1Sn_1$ | 216 | $4 \times 4 \times 4$ | $14 \times 14 \times 14$ | -0.17 | 73.40  | 83.18  |

---

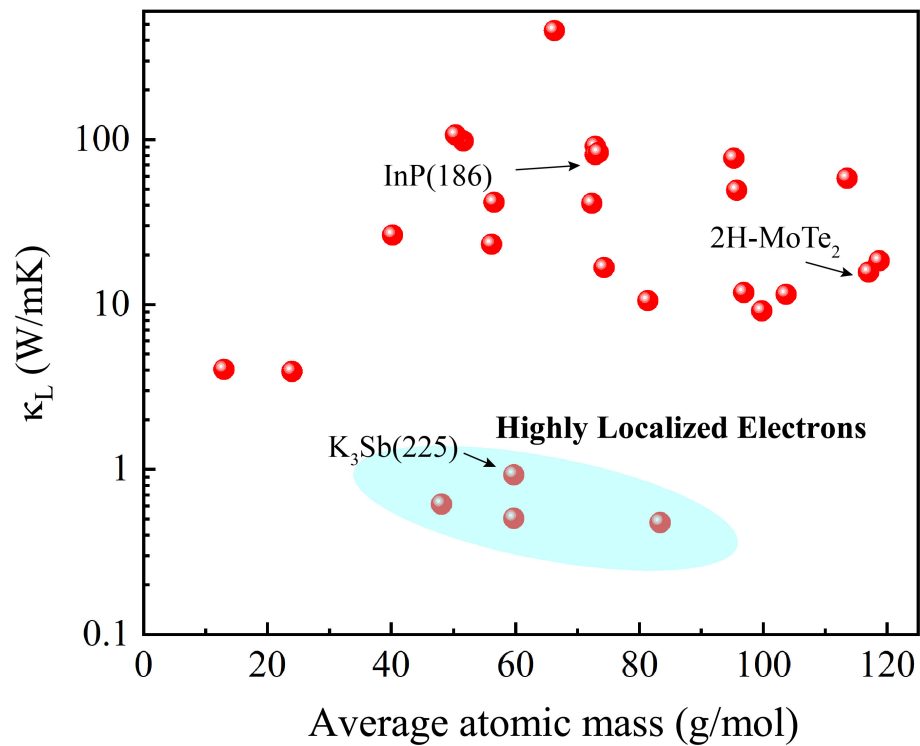

Figure S1: The  $\kappa_L$  of 26 materials without LRI versus the average atomic mass at 300K. The blue areas represent highly localized electrons in the material with extremely flat valence bands.

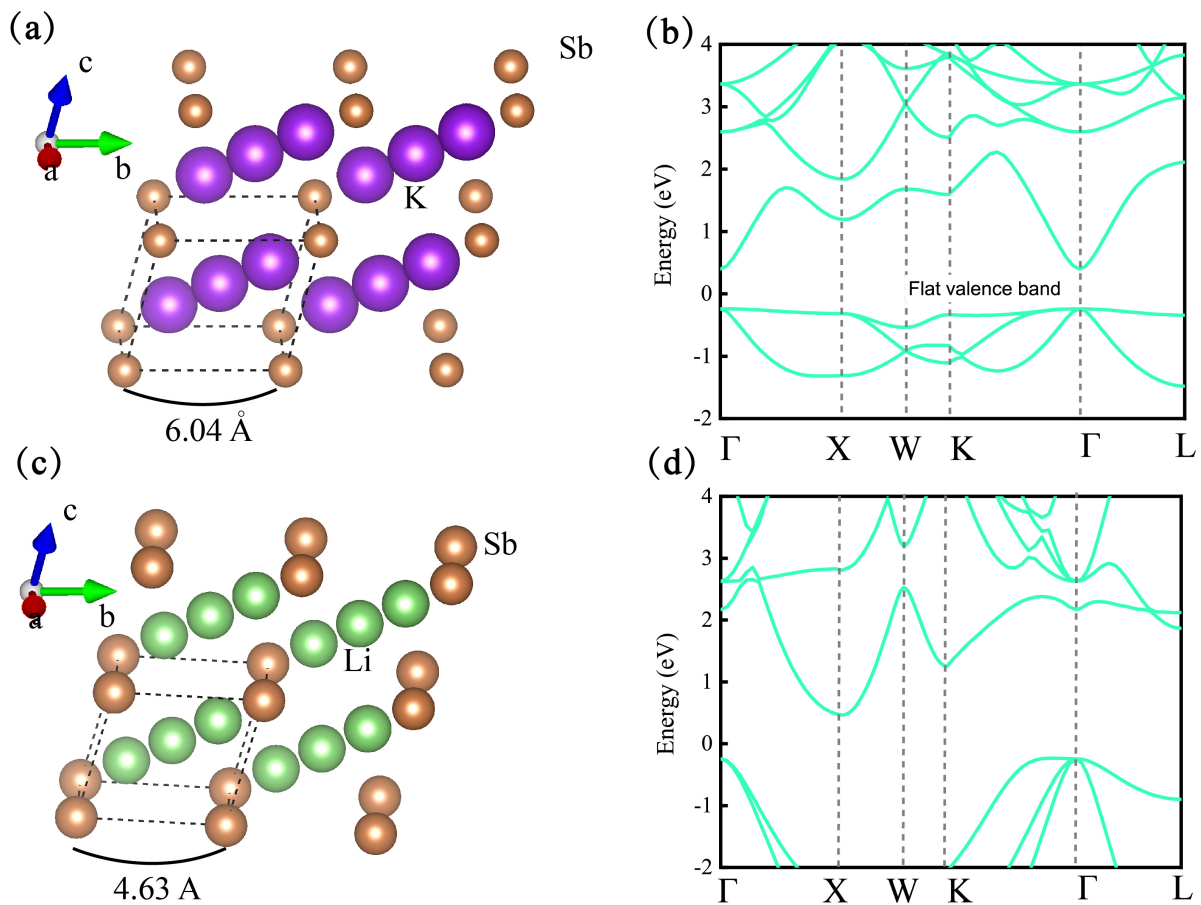

Figure S2: (a) Crystal structure and (b) band structure of  $K_3Sb$ . (c) Crystal structure and (d) band structure of  $Li_3Sb$ .

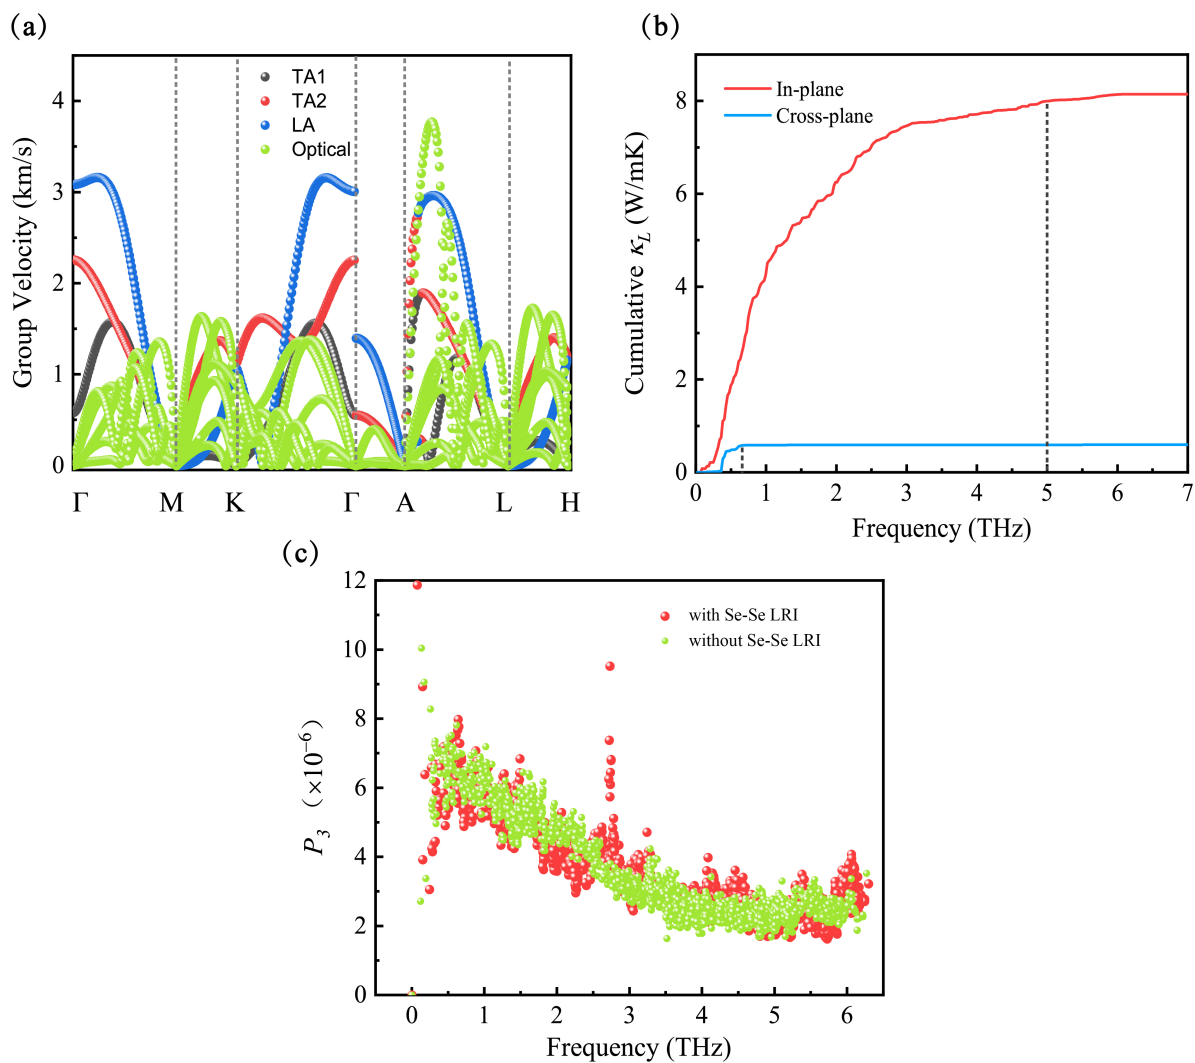

Figure S3: (a) The mode-resolved group velocity of HfSe<sub>2</sub> along the high symmetry path. (b) Frequency dependence of cumulative  $\kappa_L$ . (c) Phase space of HfSe<sub>2</sub> with and without the LRI of Se-Se.



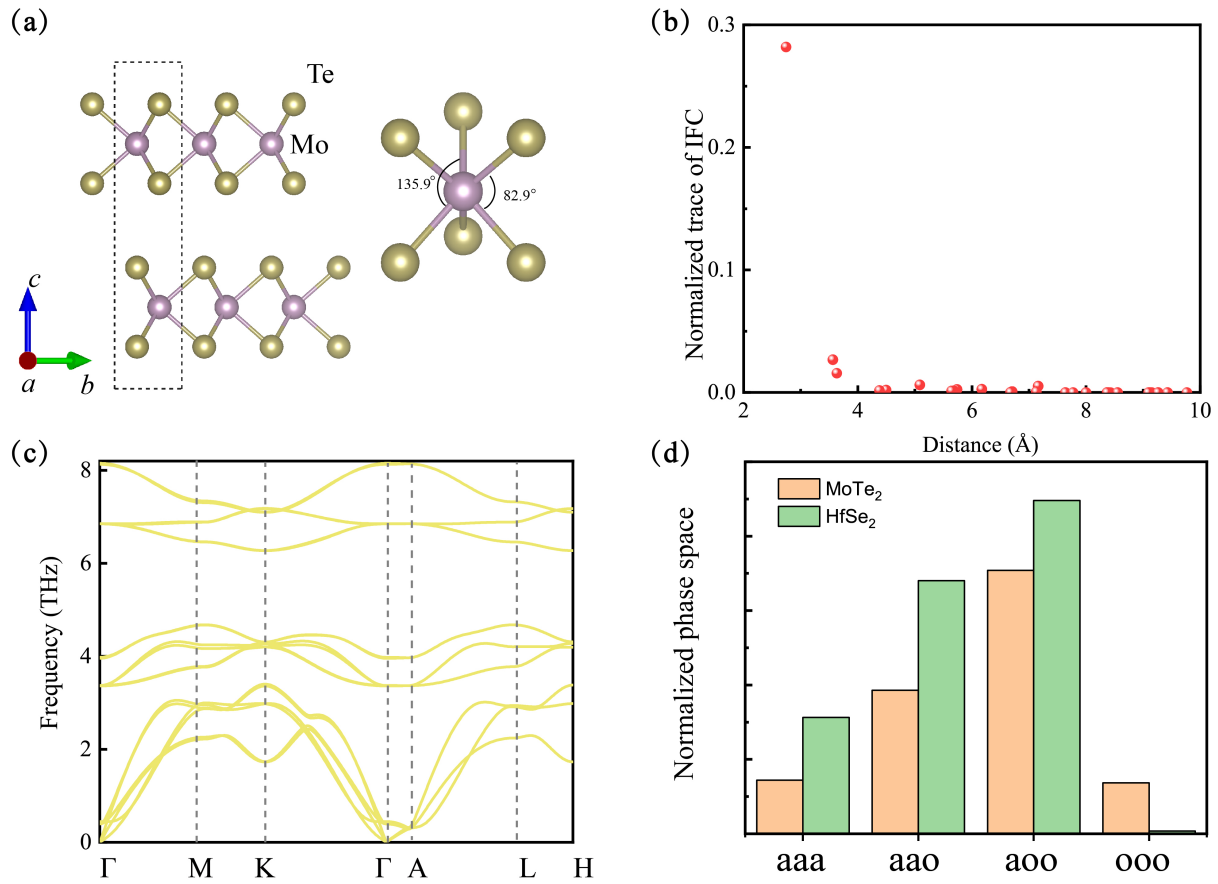

Figure S4: (a) Crystal structure of 2H-MoTe<sub>2</sub>. (b) Normalized trace of IFCs versus atomic distance at 300 K for the Te atom. (c) Phonon dispersion for 2H-MoTe<sub>2</sub> at 300 K. (d) Normalized channel resolved phase space for 2H-MoTe<sub>2</sub> and HfSe<sub>2</sub>.

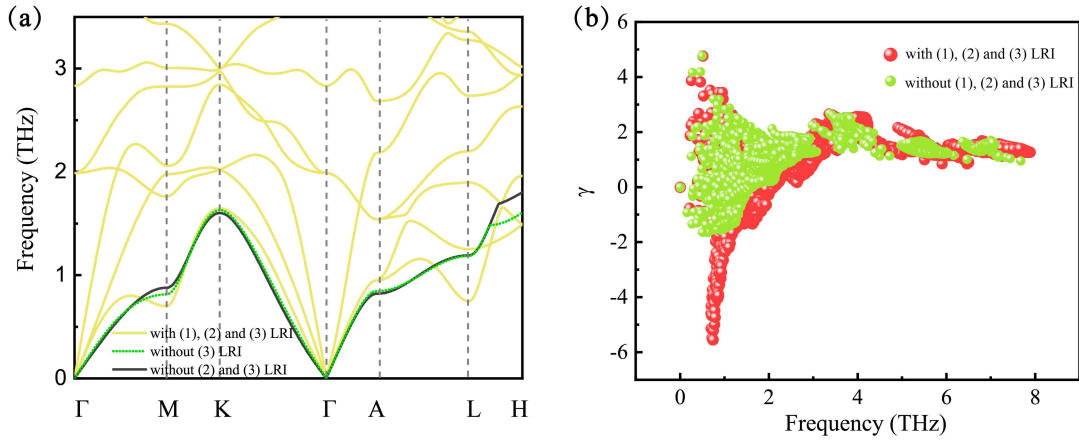

Figure S5: (a) Phonon dispersion of  $\text{Mg}_3\text{Sb}_2$  with (1), (2), (3) LRI, without (3) and without (2), (3) LRI. The used cut-off radii are 10.00 Å, 5.90 Å and 4.79 Å, respectively. (b) The frequency dependent Grüneisen parameters with and without (1), (2), (3) LRI. The cut-off radii are used 10.00Å and 4.59 Å, respectively.

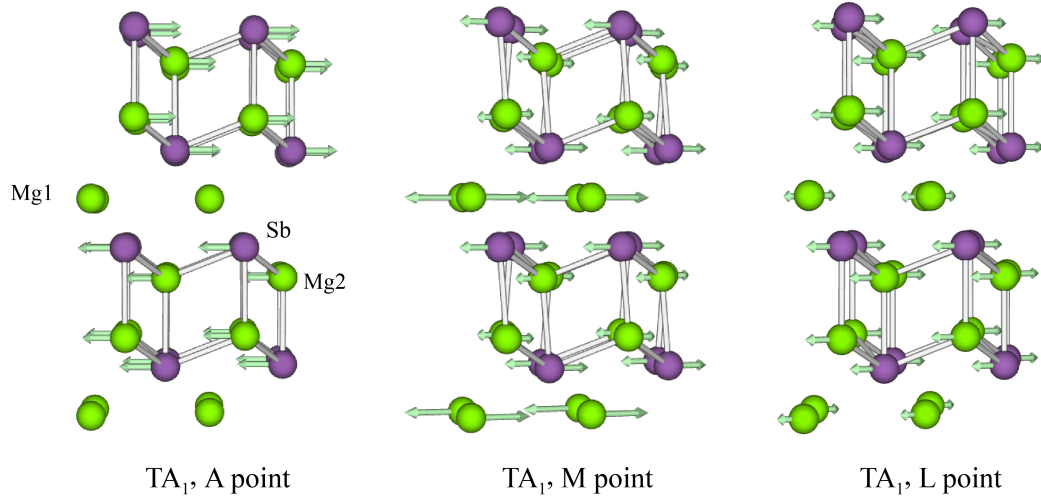

Figure S6: Visualization of vibration modes for  $\text{Mg}_3\text{Sb}_2$ .

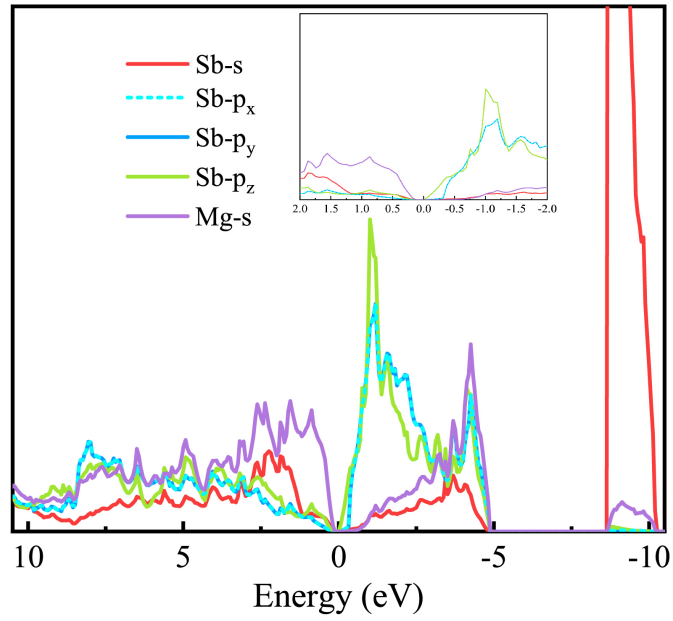

Figure S7: Electronic DOS of  $\text{Mg}_3\text{Sb}_2$  contributed by  $\text{Mg-s}$ ,  $\text{Sb-s}$  and  $\text{Sb-p}$  orbitals.

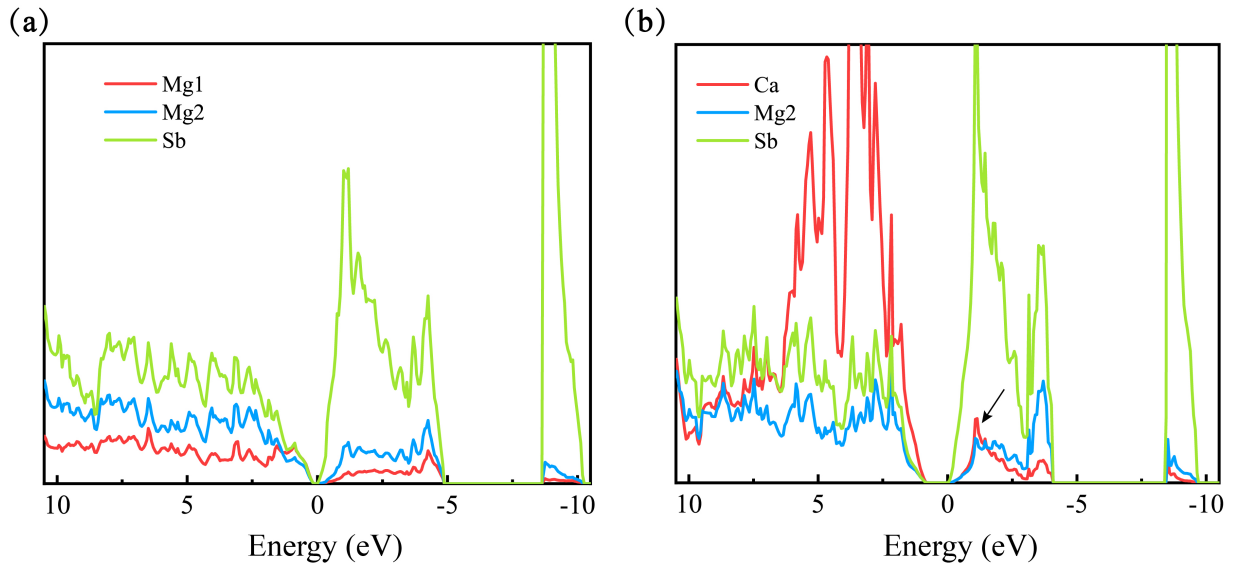

Figure S8: Electronic DOS of  $\text{Mg}_3\text{Sb}_2$  and  $\text{CaMg}_2\text{Sb}_2$  contributed by  $A$ ,  $M$  and  $X$ -site atoms in formula  $AM_2X_2$ .

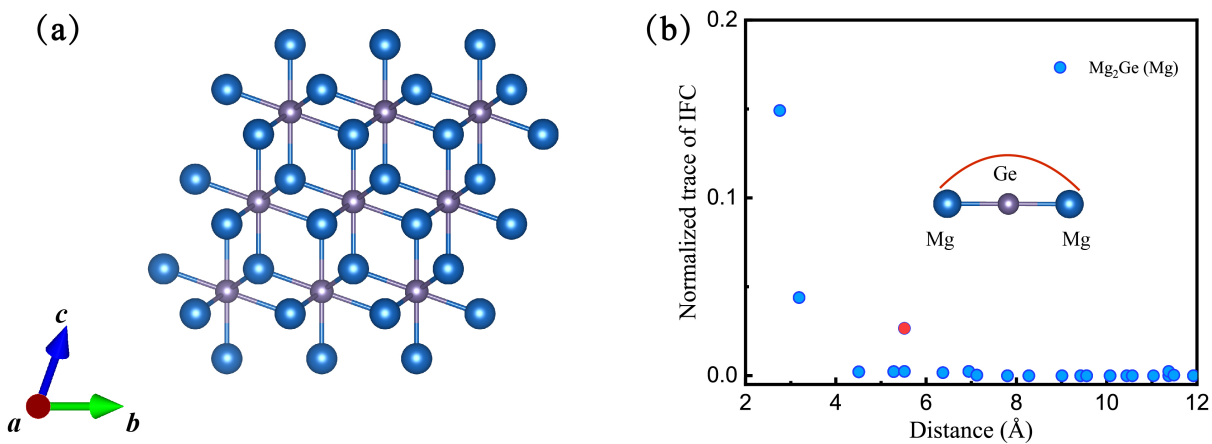

Figure S9: (a) Crystal structure of  $Mg_2Ge$  from side view. (b) Normalized trace of IFCs versus atomic distance for Mg atom.

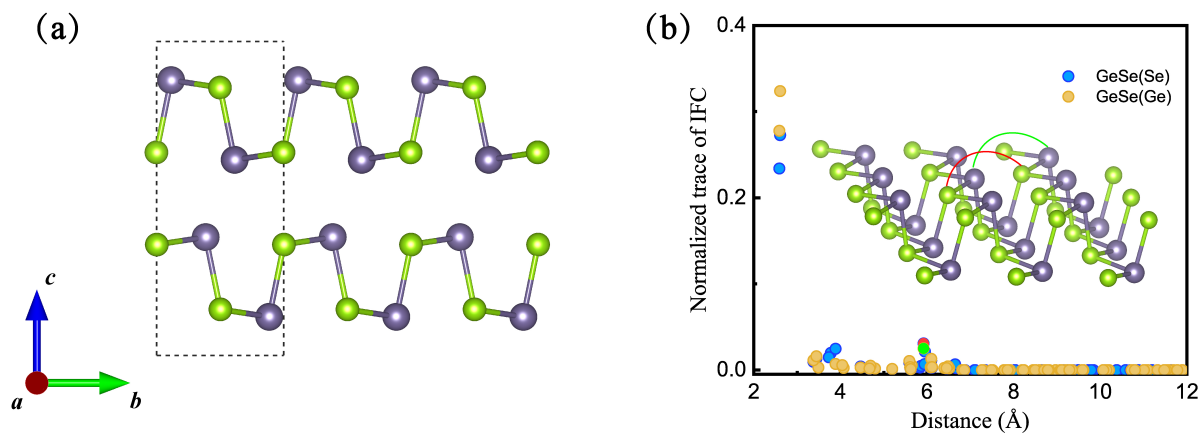

Figure S10: (a) Crystal structure of  $Pnma$ -GeSe from side view. (b) Normalized trace of IFCs versus atomic distance for Se and Ge atoms.

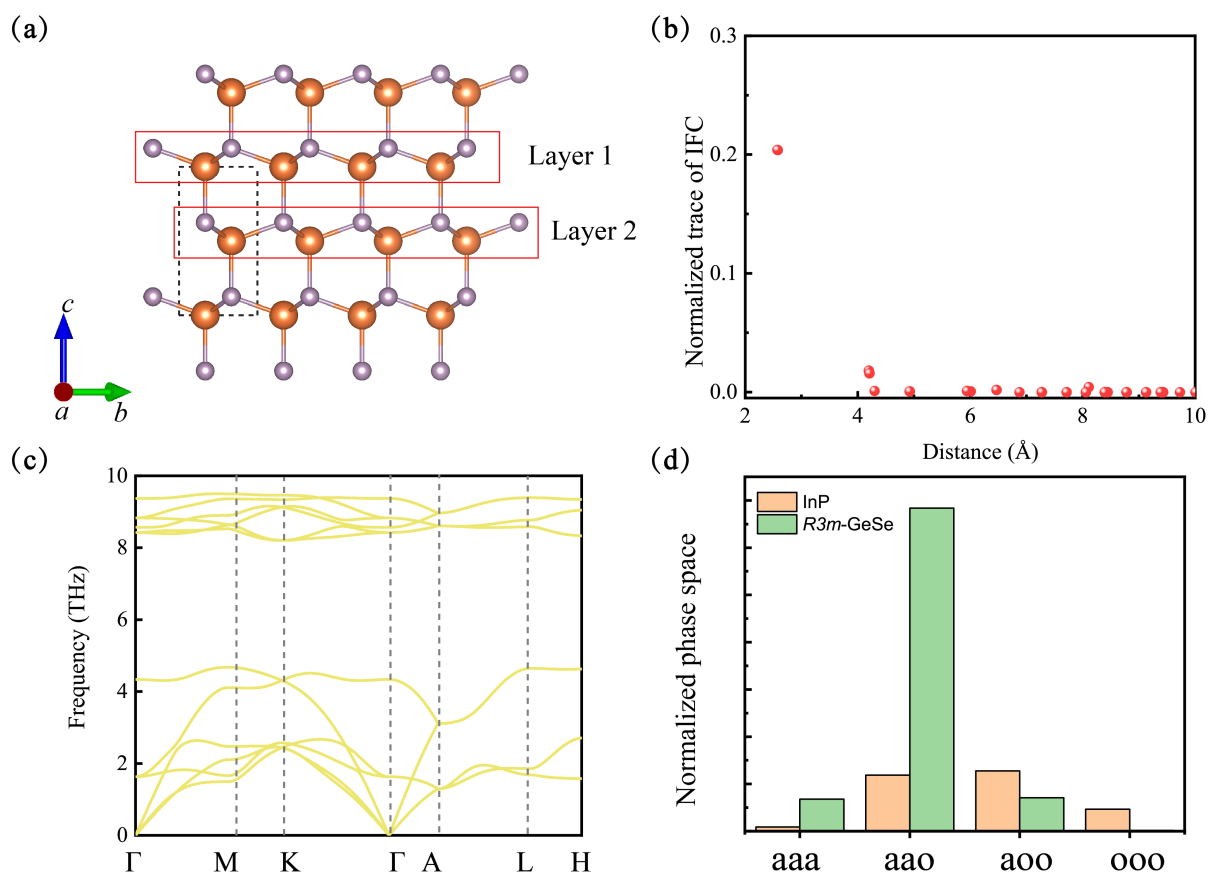

Figure S11: (a) Crystal structure of InP with space group 186. (b) Normalized trace of IFCs versus atomic distance at 300 K for the P atom. (c) Phonon dispersion for InP at 300 K. (d) Normalized channel resolved phase space for InP and  $R3m$ -GeSe.

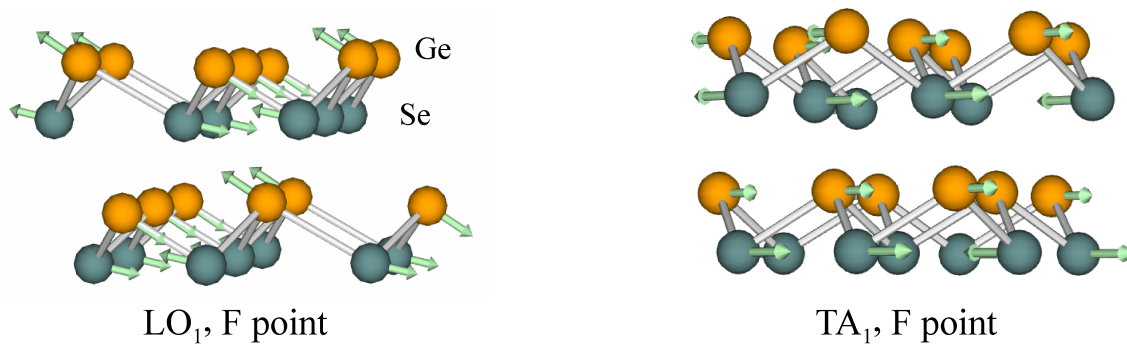

Figure S12: Visualization of vibration modes for  $R3m$ -GeSe.

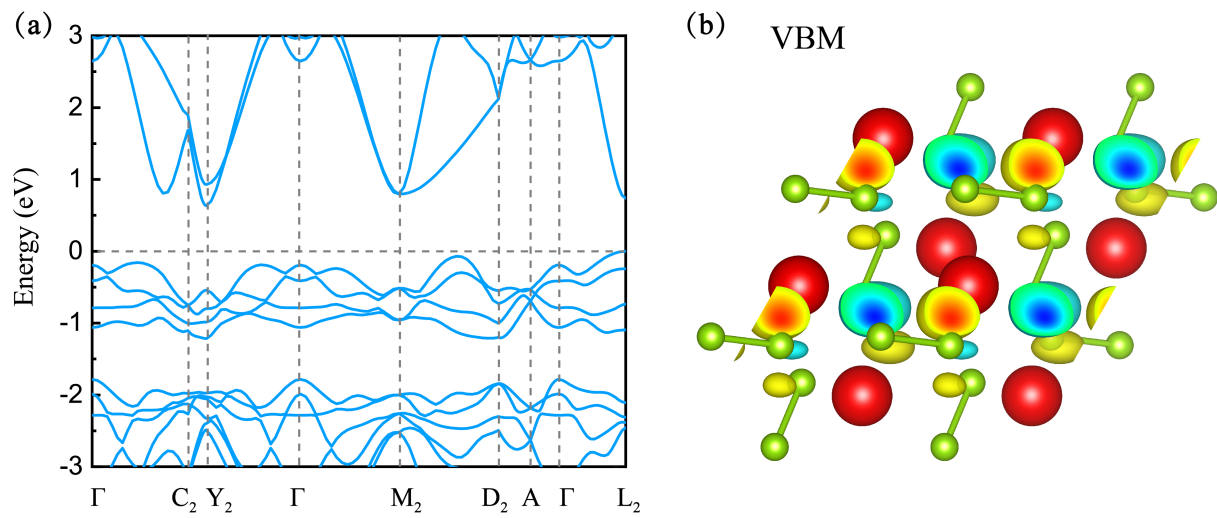

Figure S13: (a) The band structure of BaSe<sub>2</sub>. (b) The isosurfaces of the VBM electronic wavefunctions.

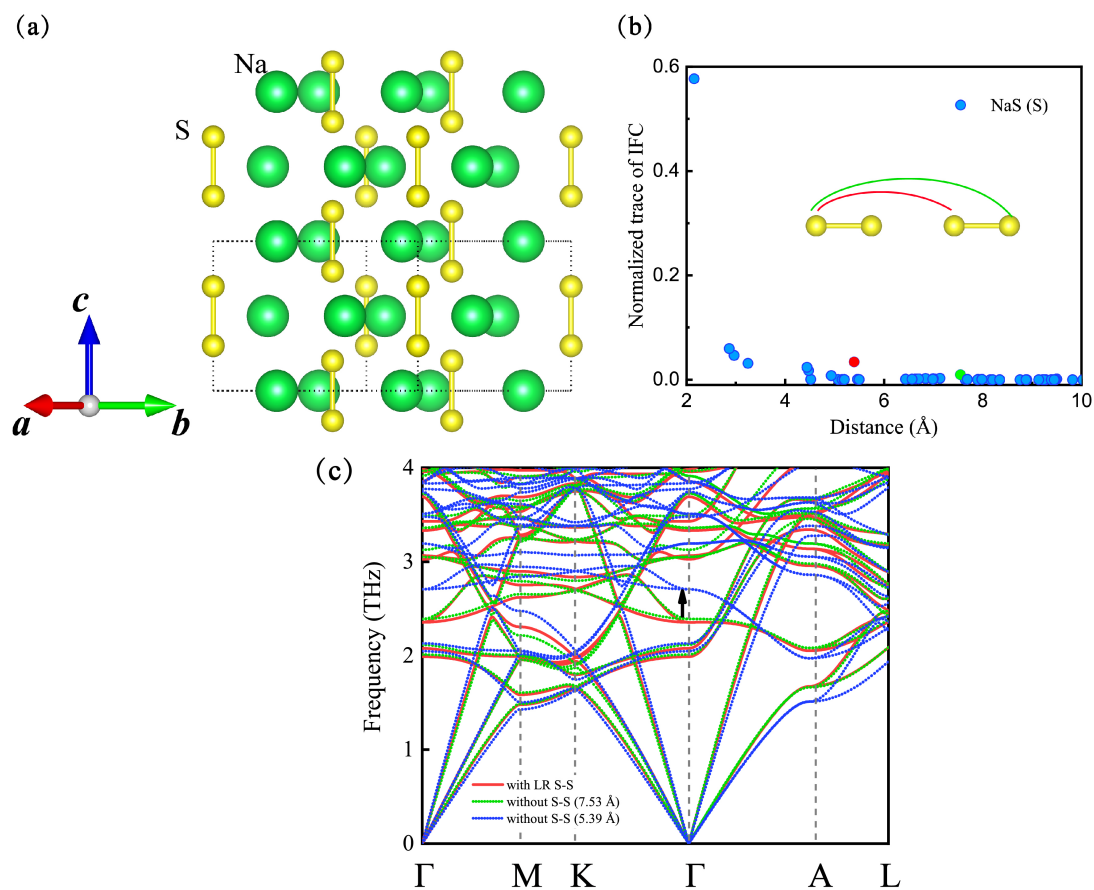

Figure S14: (a) Crystal structure of NaS from side view. (b) Normalized trace of IFCs versus atomic distance for S atoms. (c) Phonon dispersion of NaS with S-S LRI, without Se-Se (7.53 Å), and without Se-Se (5.39 Å) LRI at 300 K. The used cut-off radii are 10.00 Å, 7.52 Å and 5.38 Å, respectively.

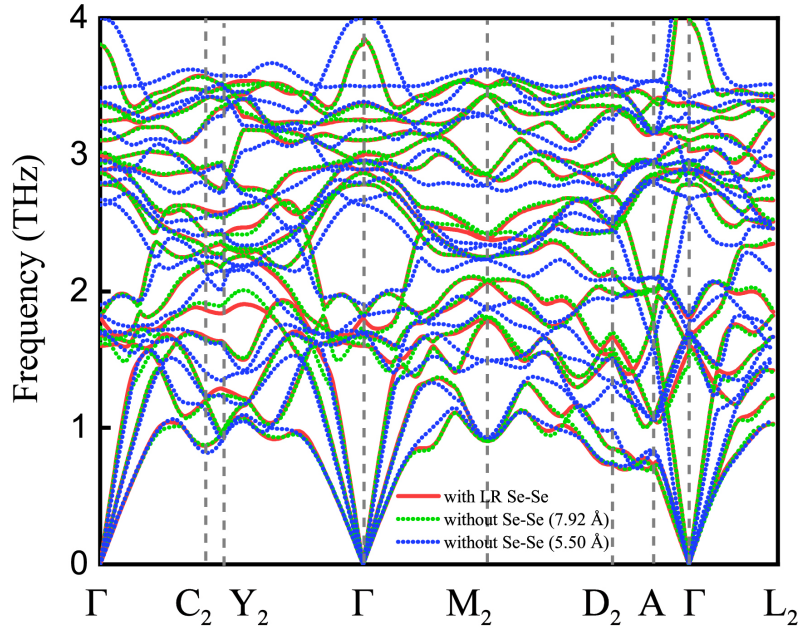

Figure S15: Phonon dispersion of BaSe<sub>2</sub> with Se-Se LRI, without Se-Se (7.92Å) and without Se-Se (5.50 Å) LRI at 300 K. The used cut-off radii are 10.00Å, 7.91Å and 5.49 Å, respectively.



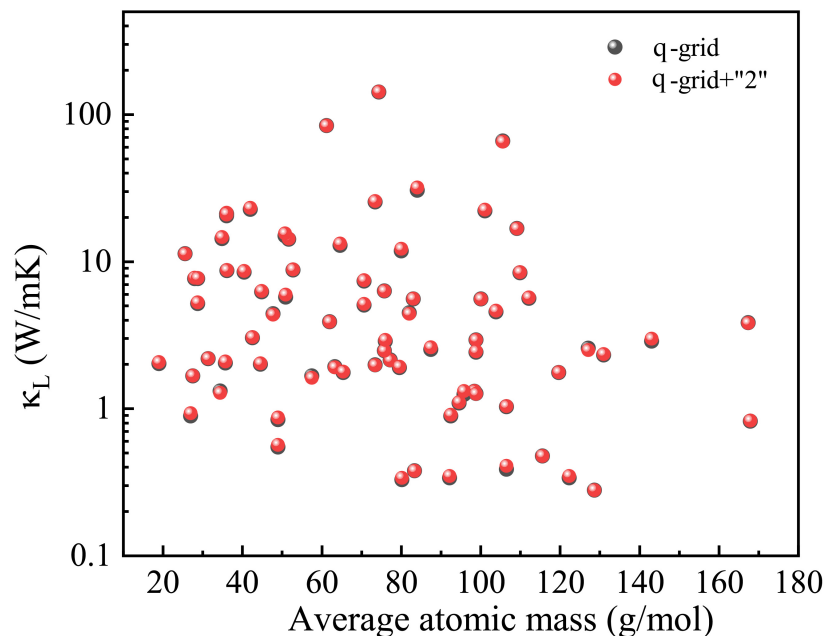

Figure S16: The calculated  $\kappa_L$  of the screened 75 materials with the **q**-grid in Table S1 and the **q**-grid in Table S1 to add 2 in each of the three directions.

## References

- (1) Yang, X.; Dai, Z.; Zhao, Y.; Liu, J.; Meng, S. Low lattice thermal conductivity and excellent thermoelectric behavior in Li<sub>3</sub>Sb and Li<sub>3</sub>Bi. *J. Phys. Condens. Matter* **2018**, *30*, 425401.
- (2) Navrátil, J.; Horák, J.; Plecháček, T.; Kamba, S.; Lošťák, P.; Dyck, J.; Chen, W.; Uher, C. Conduction band splitting and transport properties of Bi<sub>2</sub>Se<sub>3</sub>. *J. Solid State Chem.* **2004**, *177*, 1704–1712.
- (3) Rittiruum, M.; Vora-Ud, A.; Impho, W.; Seetawan, T. Prediction of thermal conductivity of Mg<sub>2</sub>X (X = Ge and Sn) by molecular dynamics. *Integr. Ferroelectr.* **2015**, *165*, 61–72.
- (4) Zhang, M.; Flitcroft, J. M.; Guillemot, S. K.; Skelton, J. M. Thermoelectric properties of Pnma and R3m GeS and GeSe. *J. Mater. Chem. C* **2023**, *11*, 14833–14847.

- (5) Shulumba, N.; Hellman, O.; Minnich, A. J. Intrinsic localized mode and low thermal conductivity of PbSe. *Phys. Rev. B* **2017**, *95*, 014302.
- (6) Skelton, J. M.; Burton, L. A.; Parker, S. C.; Walsh, A.; Kim, C.-E.; Soon, A.; Buck-eridge, J.; Sokol, A. A.; Catlow, C. R. A.; Togo, A.; Tanaka, I. Anharmonicity in the high-temperature *Cmcm* phase of SnSe: Soft modes and three-phonon interactions. *Phys. Rev. Lett.* **2016**, *117*, 075502.
